# Supplementary material for: Structural basis for guanidine sensing by the ykkC family of riboswitches
Source: PubMed Central journal article supplement — RNA. 2017 Apr;23(4):578–85. doi: 10.1261/rna.060186.116 (PMC5340920; doi:10.1261/rna.060186.116), 2017-04
Supplement: supp_060186.116_Supplemental_Fig_S2.pdf [file supp_060186.116_Supplemental_Fig_S2.pdf]

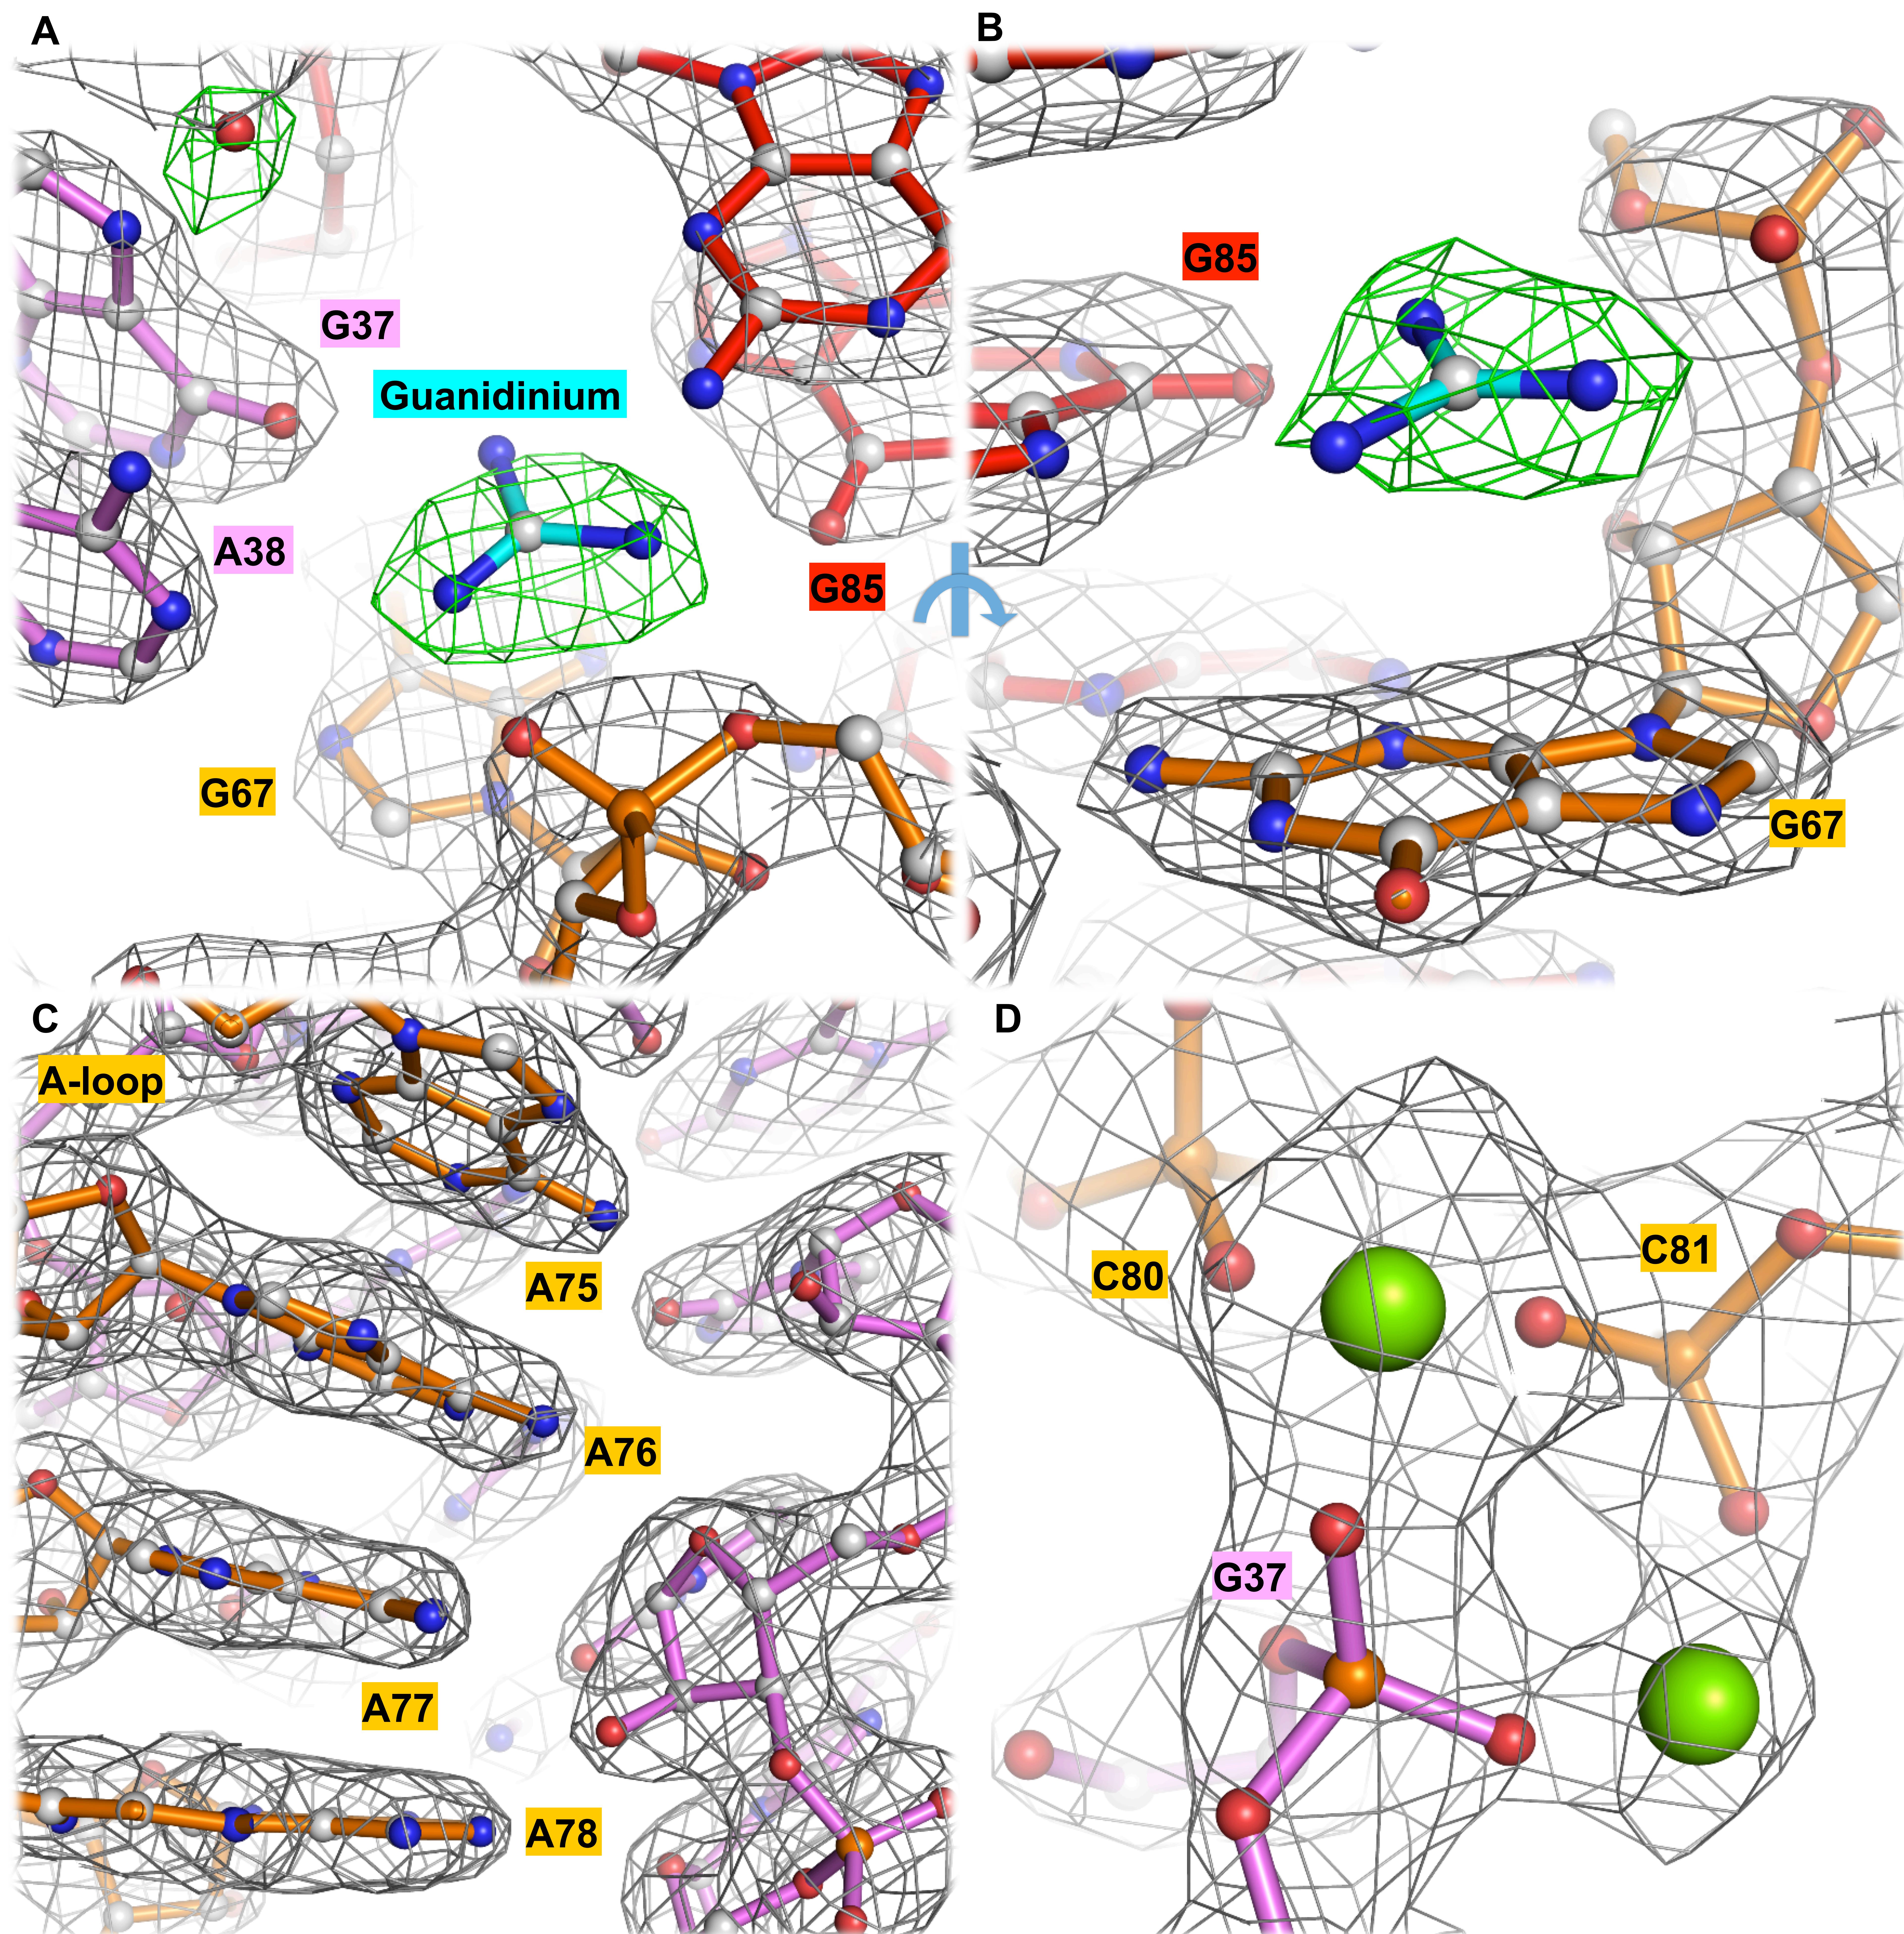

**Figure S2. Omit-map Densities of Important Regions in *Dda\_ykkC***

(A) Guanidinium in the binding pocket.

(B) Rotated view of guanidinium in the binding pocket.

(C) P3 A-loop (orange) in the L1 minor groove (pink).

(D) Coordinated  $Mg^{2+}$  ions (green spheres) between L1 (violet) and P3 (orange) backbones.
