# Supplementary material for: Structural basis for guanidine sensing by the ykkC family of riboswitches
Source: PubMed Central journal article supplement — RNA. 2017 Apr;23(4):578–85. doi: 10.1261/rna.060186.116 (PMC5340920; doi:10.1261/rna.060186.116), 2017-04
Supplement: supp_060186.116_Supplemental_Table_S1.pdf [file supp_060186.116_Supplemental_Table_S1.pdf]

**Table S1. Sequences of RNA and DNA oligonucleotides used in this study**

|                              |                                                                                                                                |
|------------------------------|--------------------------------------------------------------------------------------------------------------------------------|
| <b>Dda_ykkC_cryst</b>        | TTAAAGaattcTAATACGACTCACTATAGGTGACTAGGGTTCCGGCga<br>aaGCCGGTCCGAGAGTTACCGACCGCCgaaaGGCGGTTACACGG<br>CGGGAAAAAAGCCCGGGAGGA      |
| <b>Dda_ykkC_WT</b>           | TTAAAGaattcTAATACGACTCACTATAGGTGACTAGGGTTCCGGCT<br>TTACTGCGCAGGTCCGAGAGTTACCGACCGCCCTCTGGCGGTT<br>ACACGGCGGGAAAAAAGCCCGGGAGGA  |
| <b>Dda_ykkC_G37A</b>         | TTAAAGaattcTAATACGACTCACTATAGGTGACTAGGGTTCCGGCT<br>TTACTGCGCAGGTCCGAAAGTTACCGACCGCCCTCTGGCGGTTA<br>CACGGCGGGAAAAAAGCCCGGGAGGA  |
| <b>Dda_ykkC_A38G</b>         | TTAAAGaattcTAATACGACTCACTATAGGTGACTAGGGTTCCGGCT<br>TTACTGCGCAGGTCCGAGGGTTACCGACCGCCCTCTGGCGGTT<br>ACACGGCGGGAAAAAAGCCCGGGAGGA  |
| <b>Dda_ykkC_G67A</b>         | TTAAAGaattcTAATACGACTCACTATAGGTGACTAGGGTTCCGGCT<br>TTACTGCGCAGGTCCGAGAGTTACCGACCGCCCTCTGGCGGTT<br>ACACAGCGGGAAAAAAGCCCGGGAGGA  |
| <b>Dda_ykkC_AAAAtoUUUU</b>   | TTAAAGaattcTAATACGACTCACTATAGGTGACTAGGGTTCCGGCT<br>TTACTGCGCAGGTCCGAGAGTTACCGACCGCCCTCTGGCGGTT<br>ACACGGCGGGAAUUUUUGCCCGGGAGGA |
| <b>Dda_ykkC_G84A</b>         | TTAAAGaattcTAATACGACTCACTATAGGTGACTAGGGTTCCGGCT<br>TTACTGCGCAGGTCCGAGAGTTACCGACCGCCCTCTGGCGGTT<br>ACACGGCGGGAAAAAAGCCCGAGAGGA  |
| <b>Dda_ykkC_G85A</b>         | TTAAAGaattcTAATACGACTCACTATAGGTGACTAGGGTTCCGGCT<br>TTACTGCGCAGGTCCGAGAGTTACCGACCGCCCTCTGGCGGTT<br>ACACGGCGGGAAAAAAGCCCGGAAGGA  |
| <b>Dda_ykkC_WT_F</b>         | TTAAAGaattcTAATACGACTCACTATAGGTGACTAGGGTTCCGGCT<br>TTAC                                                                        |
| <b>Dda_ykkC_WT_R</b>         | TCCTCCCGGGCTTTTTTCCCGCCGTGTAACCGCCAGAGGGCGG<br>TCGGTAAC                                                                        |
| <b>Dda_ykkC_G67A_R</b>       | TCCTCCCGGGCTTTTTTCCCGCtGTGTAACCGCCAGAGGGCGGT<br>CGGTAAC                                                                        |
| <b>Dda_ykkC_AAAAtoUUUU_R</b> | TCCTCCCGGGCaaaaTTCCCGCCGTGTAACCGCCAGAGGGCGGT<br>CGGTAAC                                                                        |
| <b>Dda_ykkC_G84A_R</b>       | TCCTCtCGGGCTTTTTTCCCGCCGTGTAACCGCCAGAGGGCGGT<br>CGGTAAC                                                                        |
| <b>Dda_ykkC_G85A_R</b>       | TCCTtCCGGGCTTTTTTCCCGCCGTGTAACCGCCAGAGGGCGGT<br>CGGTAAC                                                                        |
