# Supplementary material for: Structural basis for guanidine sensing by the ykkC family of riboswitches
Source: PubMed Central journal article supplement — RNA. 2017 Apr;23(4):578–85. doi: 10.1261/rna.060186.116 (PMC5340920; doi:10.1261/rna.060186.116), 2017-04
Supplement: supp_060186.116_Supplemental_Table_S2.pdf [file supp_060186.116_Supplemental_Table_S2.pdf]

**Table S2. Data Collection and Refinement Statistics**

|                                       | <i>Dda_ykkC</i> IrHex          | <i>Dda_ykkC</i>                  |
|---------------------------------------|--------------------------------|----------------------------------|
| <b>Data Collection</b>                |                                |                                  |
| <b>Wavelength</b>                     | 1.1049                         | .9791                            |
| <b>Resolution range</b>               | 100.63 – 2.25 (2.32 – 2.25)    | 51.12 - 2.3 (2.382 - 2.3)        |
| <b>Space group</b>                    | P 2 12 12                      | I 2 2 2                          |
| <b>Unit cell</b>                      | 31.72 74.12 100.63<br>90 90 90 | 67.441 78.371 98.844<br>90 90 90 |
| <b>Total reflections</b>              | 73599                          | 79395 (7799)                     |
| <b>Unique reflections</b>             | 11858                          | 11977 (1178)                     |
| <b>Multiplicity</b>                   | 6.2 (5.9)                      | 6.6 (6.6)                        |
| <b>Completeness (%)</b>               | 99.5 (95.2)                    | 100 (100)                        |
| <b>Mean I/sigma(I)</b>                | 10.8 (0.8)                     | 13.33 (2.05)                     |
| <b>Wilson B-factor</b>                |                                | 54.76                            |
| <b>R-merge</b>                        | 0.070 (1.835)                  | 0.07749 (1.033)                  |
| <b>R-meas</b>                         | 0.077 (1.998)                  | 0.08472 (1.123)                  |
| <b>CC1/2</b>                          | 0.998 (0.536)                  | 0.991 (0.785)                    |
| <b>CC*</b>                            | 0.999 (0.687)                  | 0.998 (0.938)                    |
| <b>Refinement</b>                     |                                |                                  |
| <b>Reflections used in refinement</b> |                                | 16941 (1624)                     |
| <b>Reflections used for R-free</b>    |                                | 1693 (163)                       |
| <b>R-work</b>                         |                                | 0.2061 (0.4408)                  |
| <b>R-free</b>                         |                                | 0.2389 (0.4601)                  |
| <b>CC(work)</b>                       |                                | 0.978 (0.662)                    |
| <b>CC(free)</b>                       |                                | 0.960 (0.526)                    |
| <b>Number of non-hydrogen atoms</b>   |                                | 1904                             |
| macromolecules                        |                                | 1820                             |
| ligands                               |                                | 61                               |
| waters                                |                                | 23                               |
| <b>Protein residues</b>               |                                | 0                                |
| <b>RMS(bonds)</b>                     |                                | 0.014                            |
| <b>RMS(angles)</b>                    |                                | 1.28                             |
| <b>Clashscore</b>                     |                                | 6.05                             |
| <b>Average B-factor</b>               |                                | 56.54                            |
| macromolecules                        |                                | 56.23                            |
| ligands                               |                                | 67.17                            |
| solvent                               |                                | 53.44                            |
