# Supplementary figures and images for: Structural basis for guanidine sensing by the ykkC family of riboswitches
Source: PubMed Central journal article supplement — RNA. 2017 Apr;23(4):578–85. doi: 10.1261/rna.060186.116 (PMC5340920; doi:10.1261/rna.060186.116), 2017-04

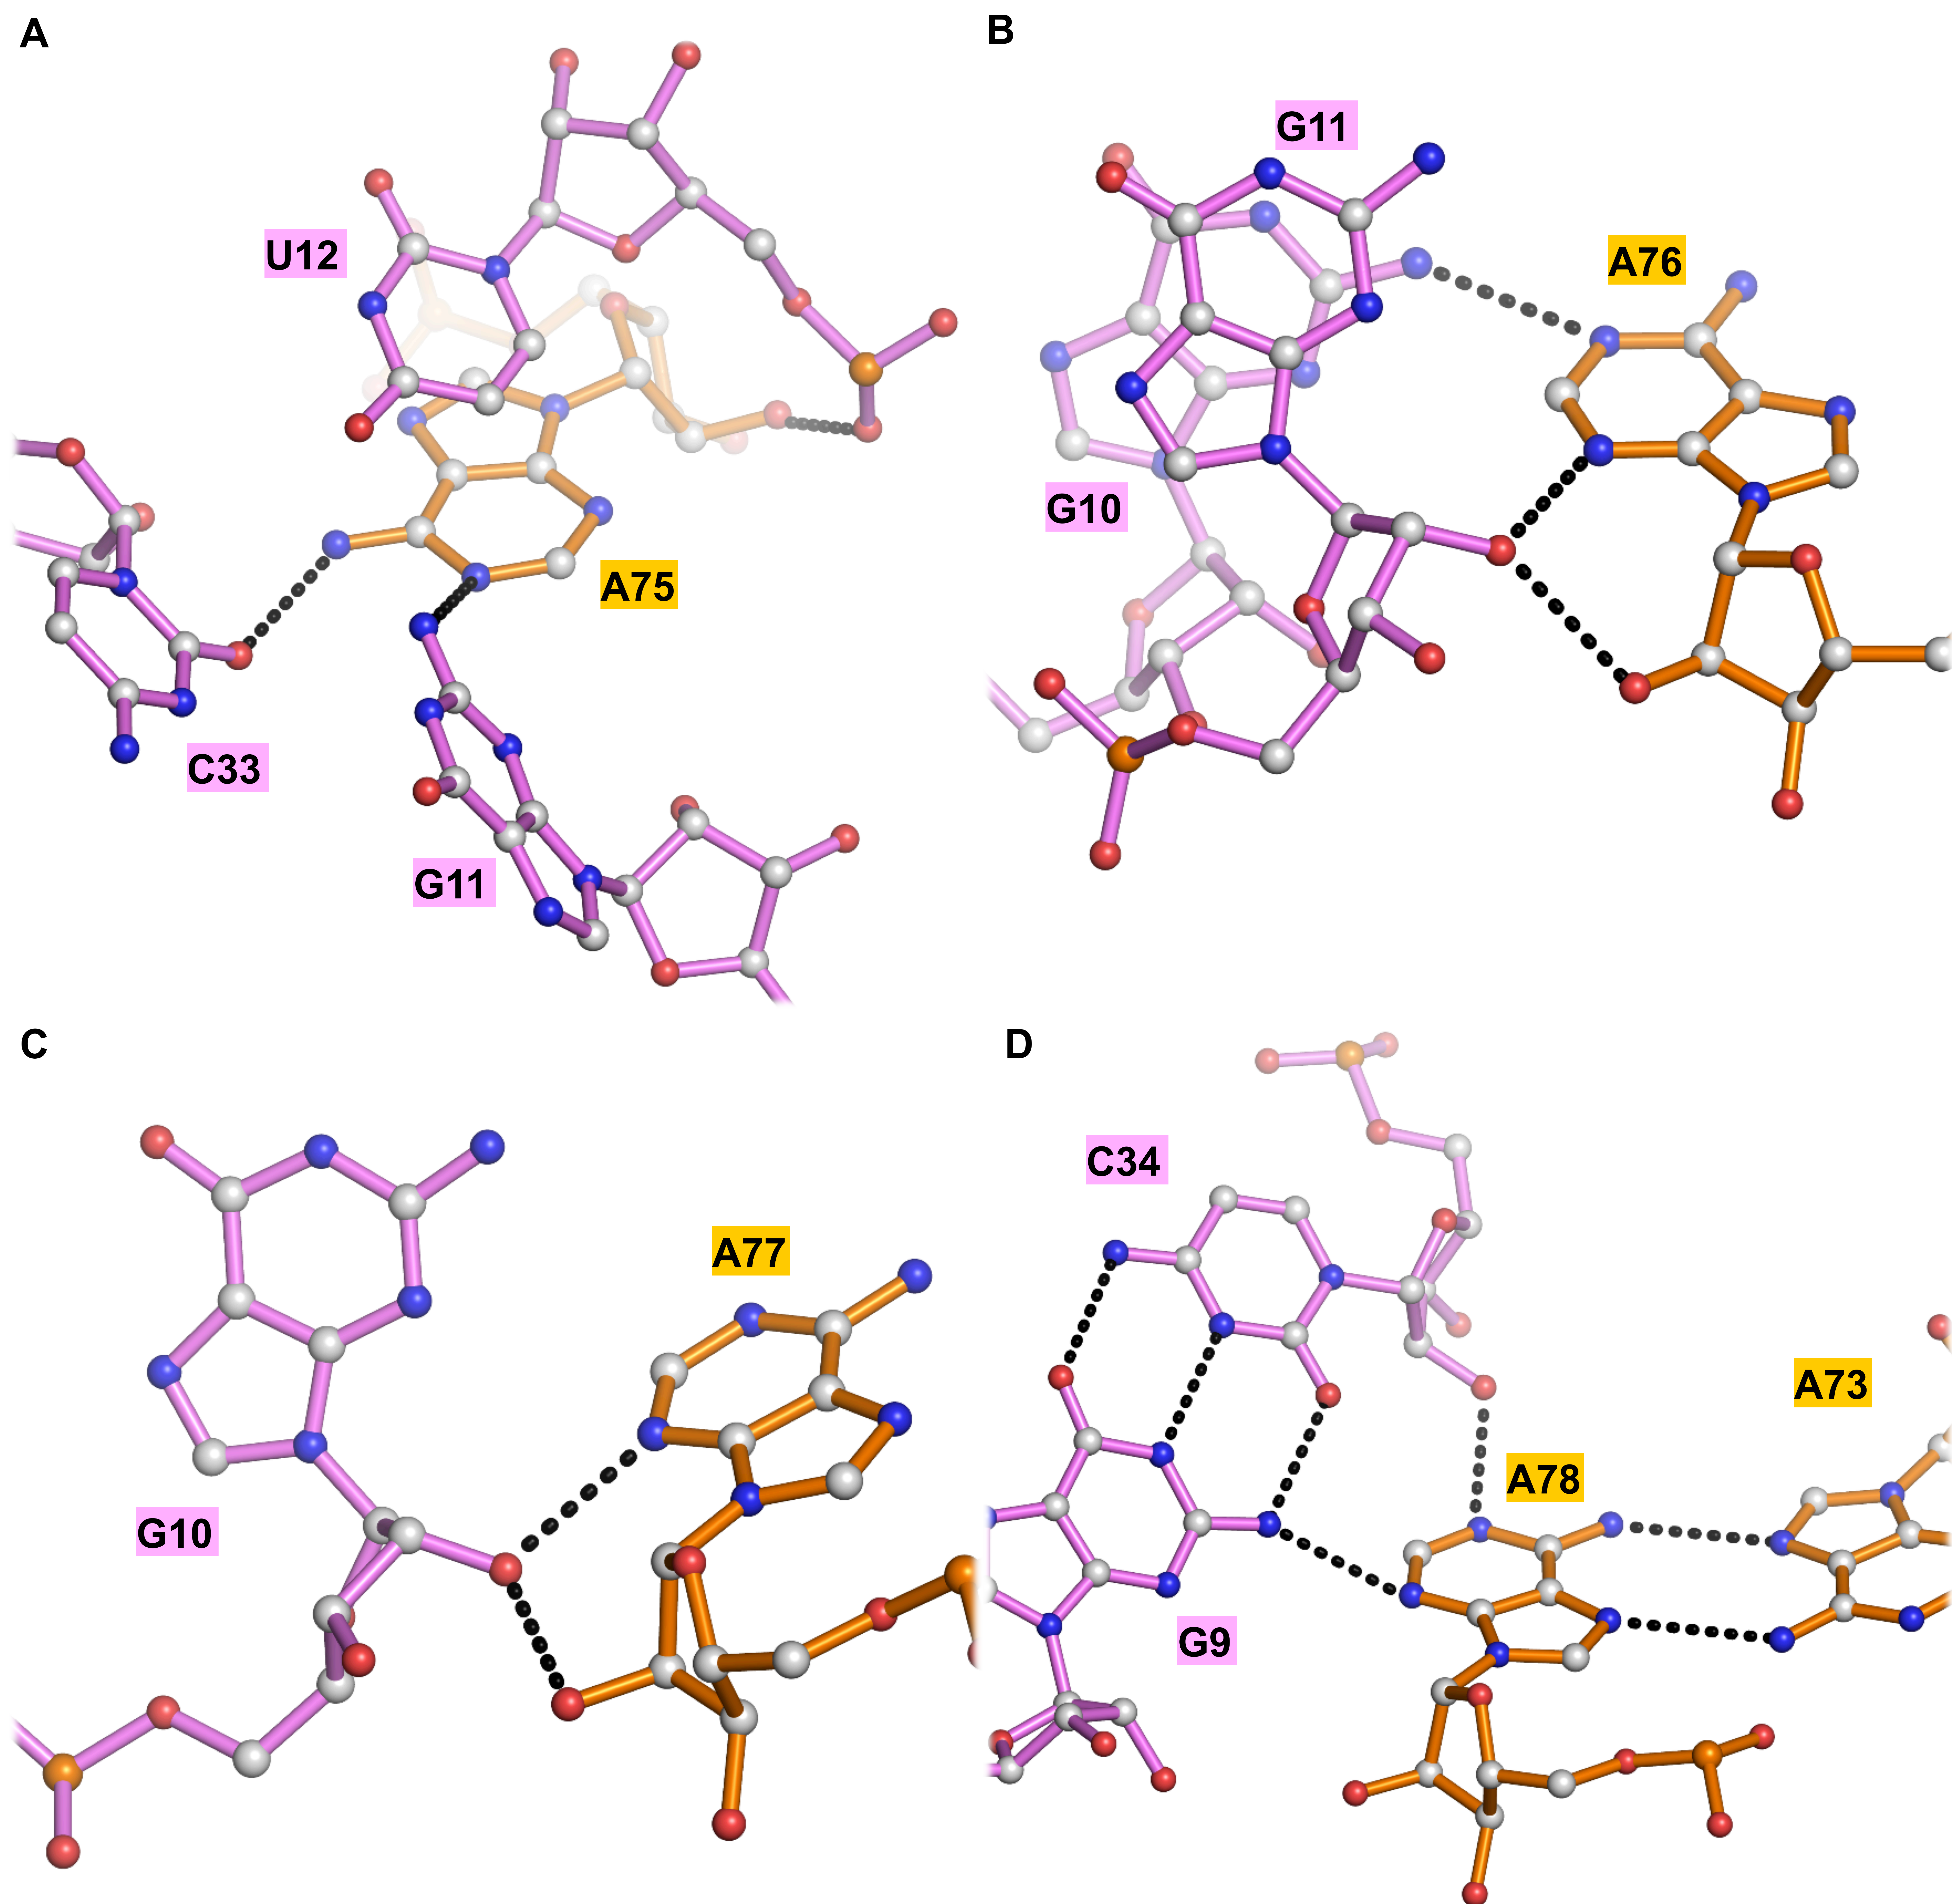

**Figure S1. Individual Tertiary Interaction Between A-loop Residues and L1 Minor Groove**  
 (A) A75 (B) A76 (C) A77 (D) A78

Supplement: supp_060186.116_Supplemental_Fig_S1.pdf [file supp_060186.116_Supplemental_Fig_S1.pdf]

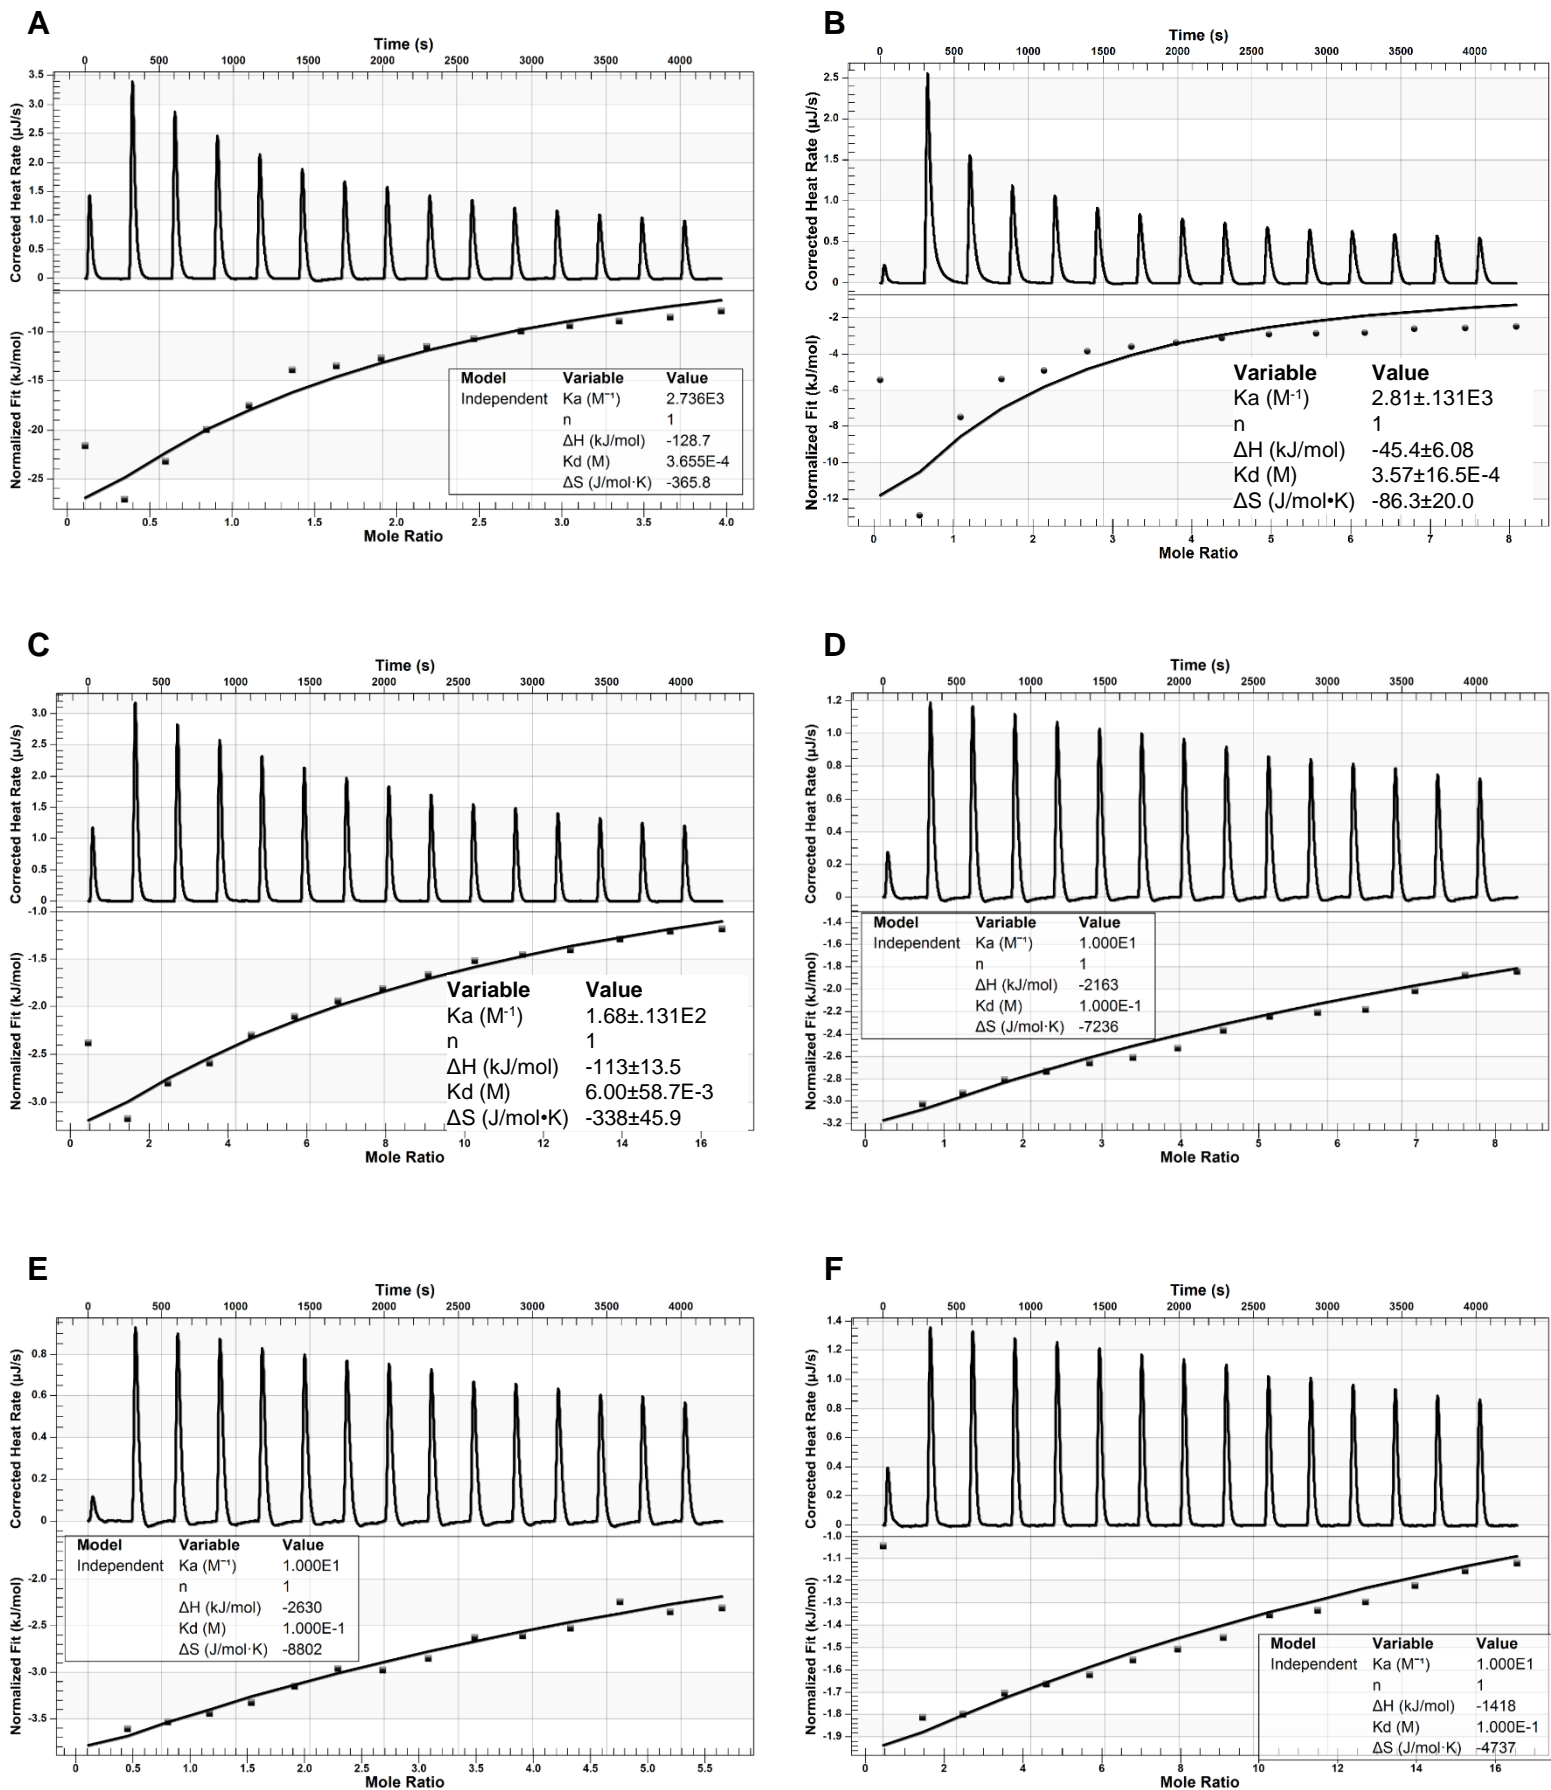

**Figure S3. ITC analysis of *Dda\_ykkC* mutants.**

(A) A38G. (B) G37A. (C) G67A. (D) AAAA to UUUU. (E) G85A. (F) G84A.

Supplement: supp_060186.116_Supplemental_Fig_S3.pdf [file supp_060186.116_Supplemental_Fig_S3.pdf]
